# Supplementary material for: A NIR fluorescent probe for the specific detection of hypochlorite and its application in vitro and in vivo
Source: Royal Society of Chemistry journal article supplement (doi:10.1039/d2ay00561a), 2022-01-01
Supplement: d2ay00561a1.pdf [file d2ay00561a1.pdf]

## Supporting Information

### *A NIR fluorescent probe for the specific detection of hypochlorite and its application in vitro and vivo*

Lu Zhen,<sup>a†</sup> Jinshuai Lan,<sup>a,b†</sup> Shengan Zhang,<sup>c</sup> Li Liu,<sup>a</sup> Ruifeng Zeng,<sup>a</sup> Yi Chen,<sup>\*b</sup> Yue Ding,<sup>\*a,b</sup>

<sup>a</sup> School of Pharmacy, Shanghai University of Traditional Chinese Medicine, Shanghai, 201203, Republic of China

<sup>b</sup> Experiment Center of Teaching and Learning, Shanghai University of Traditional Chinese Medicine, Shanghai, 201203, Republic of China

<sup>c</sup> School of Basic Medicine, Shanghai University of Traditional Chinese Medicine, Shanghai, 201203, Republic of China

\*Corresponding authors: chenyi@shutcm.edu.cn, Tel: 021-51322318;  
dingyue-2001@hotmail.com, Tel: 021-51322318.

† These authors contributed equally to this work.

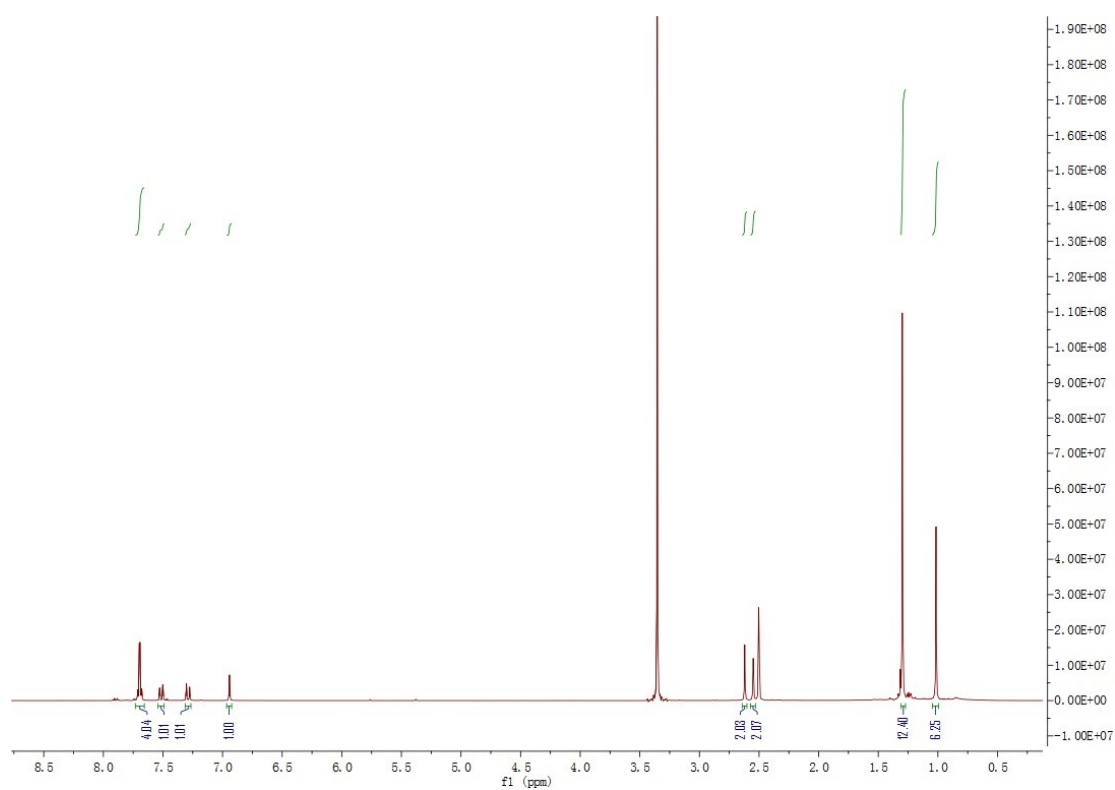

**Fig. S1.**  $^1\text{H}$  NMR spectrum of probe DAB in  $\text{DMSO-d}_6$ .

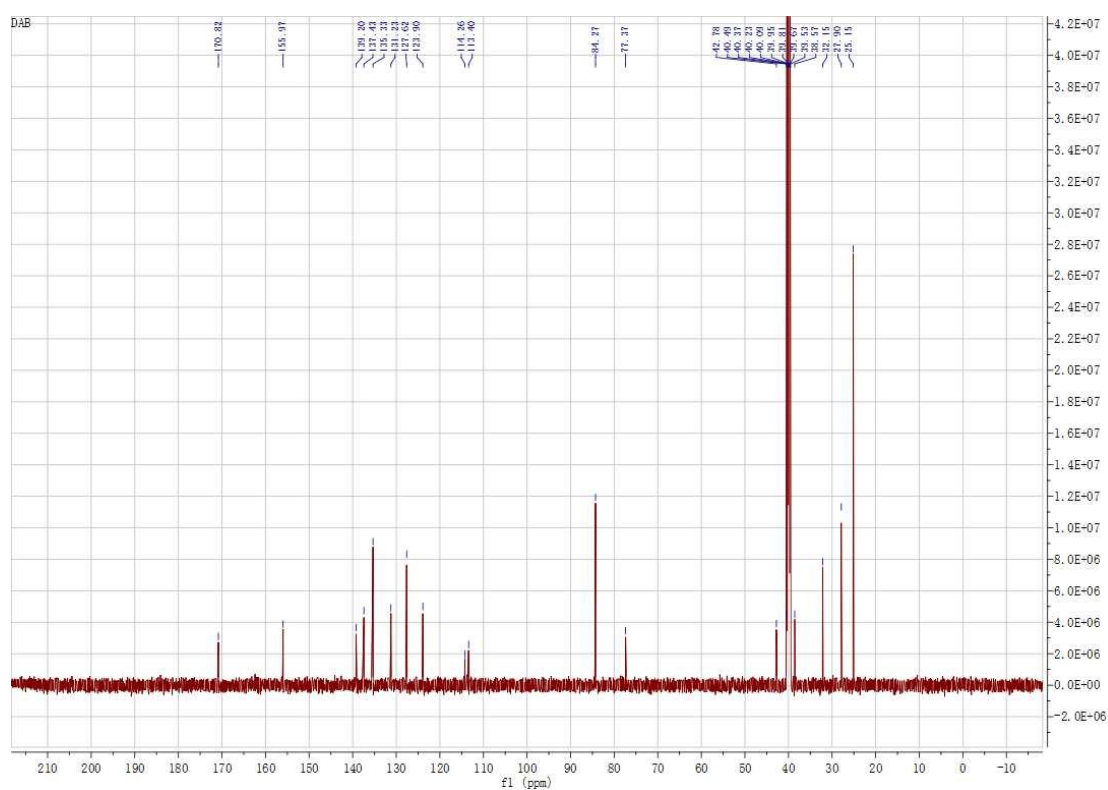

**Fig. S2.**  $^{13}\text{C}$  NMR spectrum of probe DAB in  $\text{DMSO-d}_6$ .

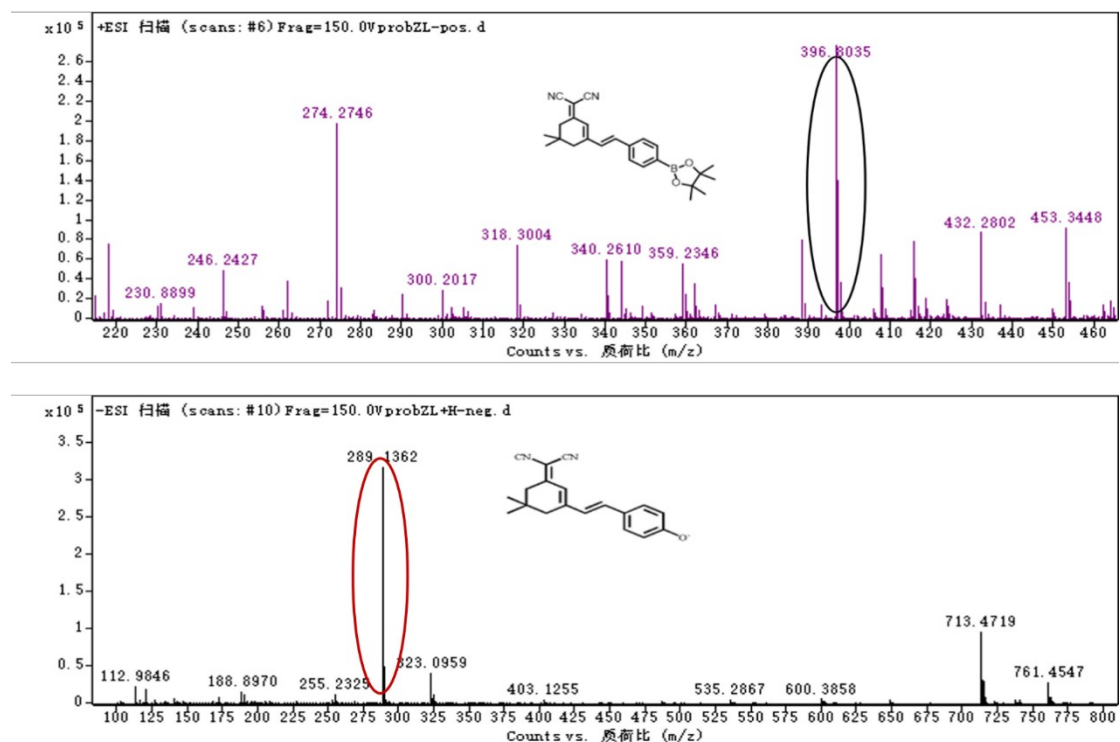

**Fig. S3.** Mass spectrum of probe DAB (A) and the crude product from the reaction of the probe with ClO<sup>-</sup> (B).

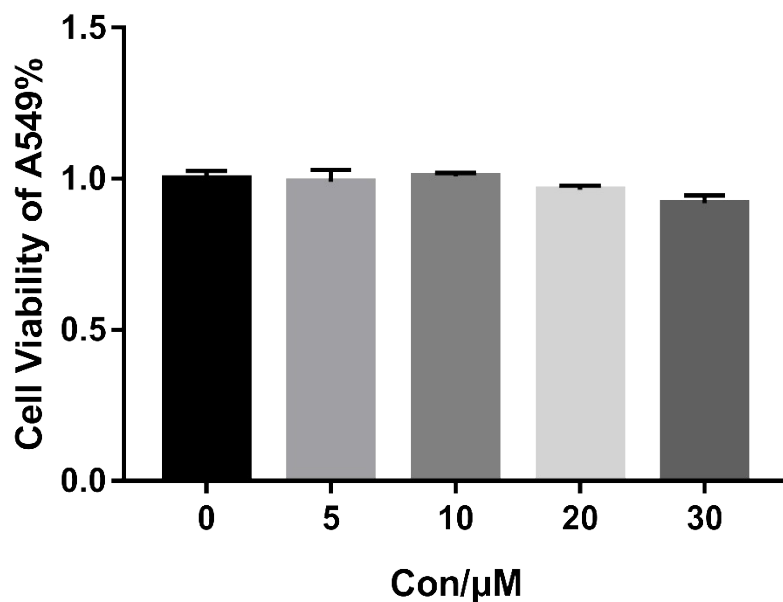

**Fig. S4.** Toxicity of various concentrations of probe DAB (0, 5, 10, 20, 30 μM) to A549 cells, the cell viability was detected by CCK-8.

**Table S1.** Comparison of fluorescence probes for  $\text{ClO}^-$ .

| Probe                                                                               | $\lambda_{\text{em}}$ (nm) | Reaction time | LOD                | biological system                        | Ref.      |
|-------------------------------------------------------------------------------------|----------------------------|---------------|--------------------|------------------------------------------|-----------|
| 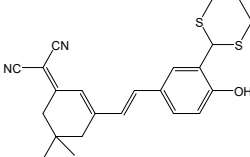   | 590                        | Within 20 s   | 4.64 $\mu\text{M}$ | Cell and zebrafish imaging               | S1        |
|    | 413                        | A few seconds | 1.74 $\mu\text{M}$ | Zebrafish imaging and water sample       | S2        |
|    | 523                        | Within 3 s    | 2.66 $\mu\text{M}$ | Cell imaging and water sample            | S3        |
|  | 490                        | Within 2 min  | 1.4 $\mu\text{M}$  | Tap water                                | S4        |
|  | 660                        | Within 1 min  | 1.46 $\mu\text{M}$ | Cell, zebrafish imaging and water sample | This work |

## References

- [1] X.U. Kong, S.M. Shuang, Y.T. Zhang, Y. Wang, C. Dong, Dicyanoisophorone-based fluorescent probe with large Stokes shift for ratiometric detection and imaging of exogenous/endogenous hypochlorite in cell and zebrafish, *Talanta*, 2022, 242: 123293.
- [2] S. Boeon, K. Hyeongjin, J. Soogyong, K. Ki-Tae, Ki. Cheal, A benzothiazole-based fluorescent and colorimetric probe for the detection of  $\text{ClO}^-$  and its application to zebrafish and water sample, *Spectrochimica Acta Part A: Molecular and Biomolecular Spectroscopy*, 2022, 270: 120827.

- [3] J.W. Li, C.X. Yin, T. Liu, Y. Wen, F. J. Huo, A new mechanism-based fluorescent probe for the detection of  $\text{ClO}^-$  by UV-vis and fluorescent spectra and its applications, *Sensors & Actuators: B. Chemical*, 2017, 252: 1112-1117.
- [4] X.H. Cheng, S.H. Qu, Z.C. Zhong, W.N. Li, Coumarin-Based Fluorescent Probe for Hypochlorites and Real Application in Tap Water, *Journal of fluorescence*, 2017, 27(4):1427-1433.
